# Supplementary material
Source: PubMed Central journal article supplement (PMC9233112)
Supplement: NIHMS1805001-supplement-Final_Combined_Supplement.pdf [file NIHMS1805001-supplement-Final_Combined_Supplement.pdf]

## **SUPPLEMENTAL MATERIAL**

# Supplemental Figure 1.

Survival by RHF groups for patients who are alive at 1 month post-implant according to type of RHF manifestation

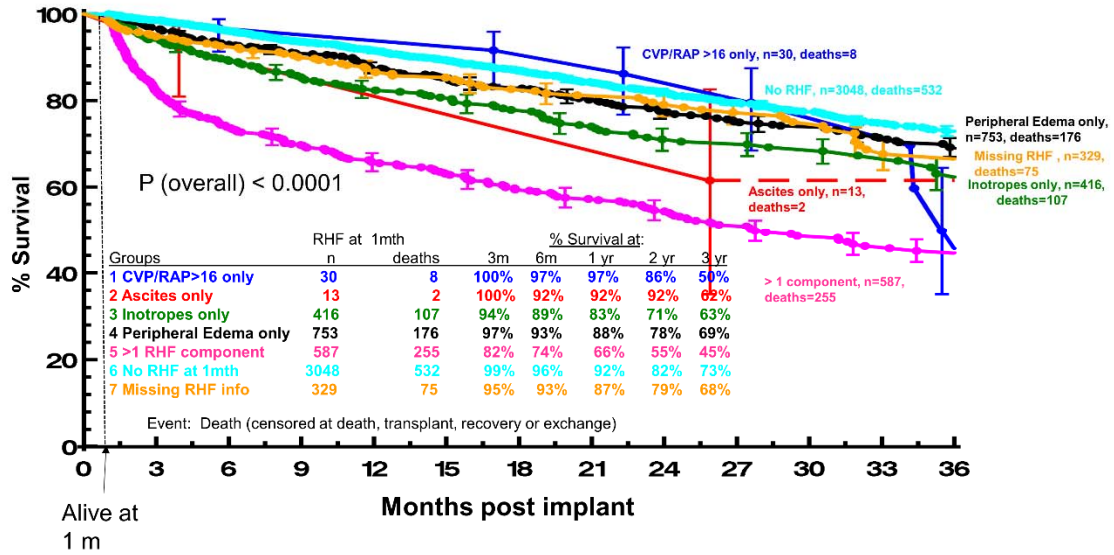

## Supplemental Figure 2. Panel a

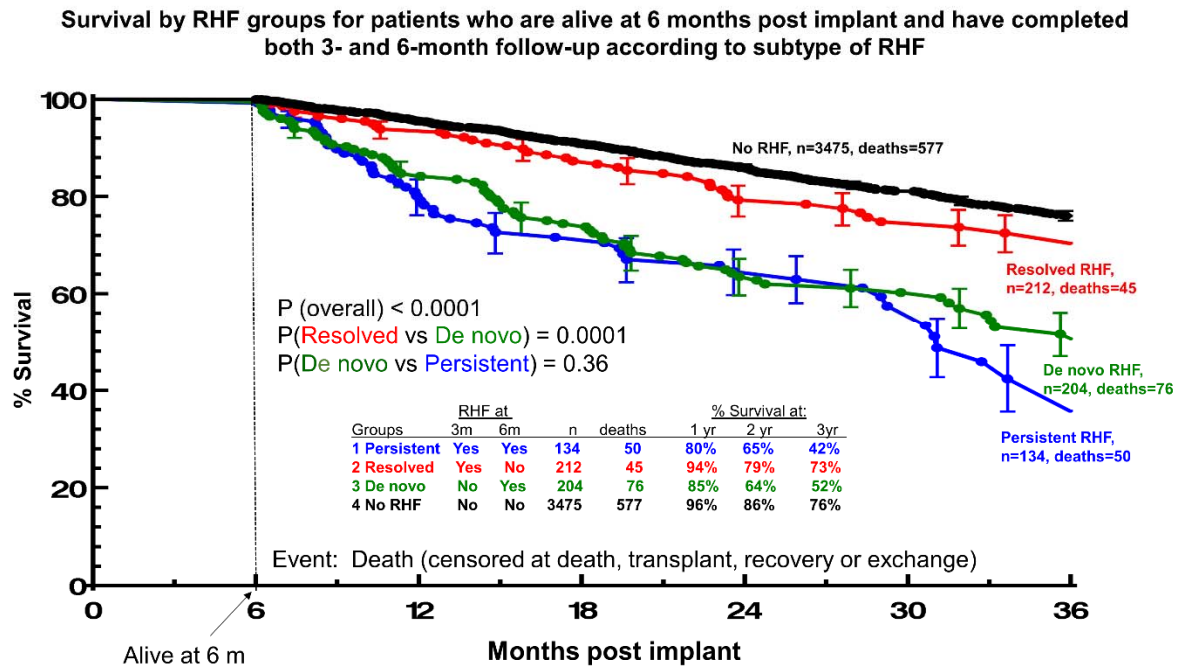

## Supplemental Figure 2. Panel b

Survival by RHF groups for patients who are alive at 12 months post implant and have completed 3-, 6- and 12-month follow-up according to subtype of RHF

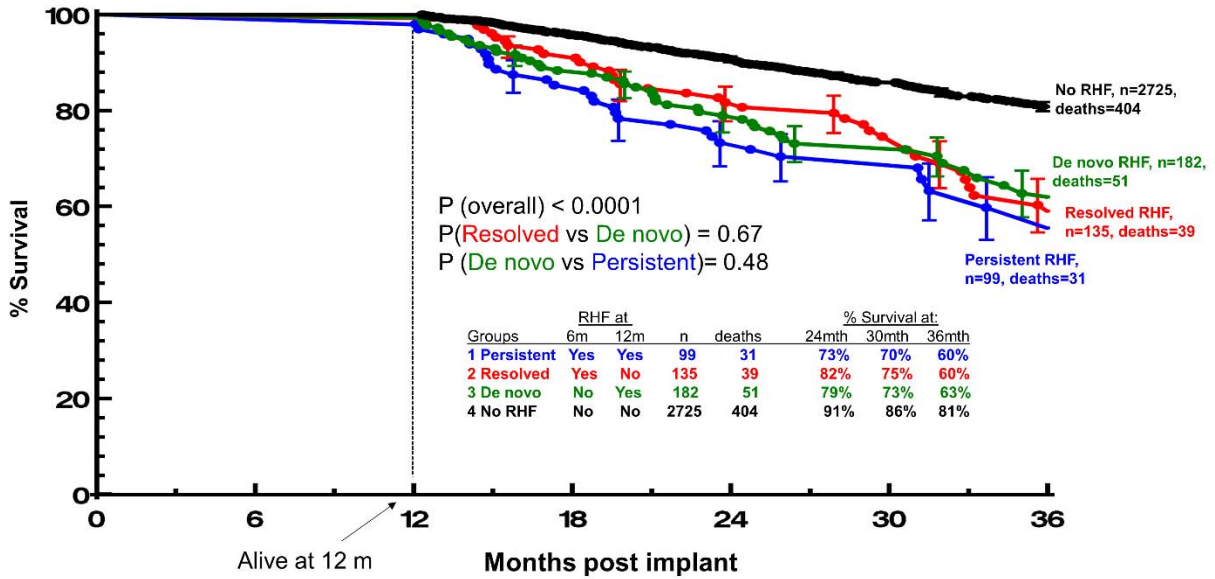

## **Supplemental figure legends**

**Supplemental Figure 1. Survival by RHF groups for patients who are alive at 1 month post-implant according to type of RHF manifestation. Event was death censored at transplant, recovery or exchange.**

**Supplemental Figure 2. Panel A. Survival by RHF groups for patients who are alive at 6 months post implant and have completed both 3- and 6-month follow-up according to subtype of RHF. Panel B. Survival by RHF groups for patients who are alive at 12 months post implant and have completed 3-, 6- and 12-month follow-up according to subtype of RHF. Event was death censored at transplant, recovery or exchange.**

## Supplemental Table 1. Potential Covariates for Modeling

|                                              |                                                   |
|----------------------------------------------|---------------------------------------------------|
| Age                                          | History of Alcohol Abuse                          |
| Married                                      | Pulmonary Vascular Disease                        |
| Female                                       | History of Stroke                                 |
| White                                        | History of Noncompliance                          |
| College                                      | Previous Atrial Valve Repair/Replacement          |
| Hispanic                                     | Previous Mitral Valve Repair/Replacement          |
| INR                                          | Previous Tricuspid Valve Repair/Replacement       |
| Sodium                                       | Previous Cardiac Surgery                          |
| BUN                                          | Left Ventricular Ejection Fraction < 20%          |
| SGOT/AST                                     | Cardiac Index                                     |
| Creatinine                                   | Elevated Systolic Blood Pressure > 120 mmHg       |
| Bilirubin                                    | Pulmonary Wedge Pressure                          |
| Albumin                                      | Diastolic Blood Pressure                          |
| WBC                                          | Left Ventricular End Diastolic Diameter           |
| SGPT/ALT                                     | Cardiac Output                                    |
| LDH                                          | Pulmonary Vascular Resistance                     |
| Right Ventricular Ejection Fraction - Severe | Pulmonary Systolic Pressure                       |
| Ascites                                      | Mitral Regurgitation (Moderate/Severe)            |
| CV Pressure                                  | Pulmonary Diastolic Pressure                      |
| Inotropes                                    | Tricuspid Regurgitation (Moderate/Severe)         |
| Device Strategy                              | Atrial Regurgitation (Moderate/Severe)            |
| Patient Profile                              | Left Ventricular Assist Device - Centrifugal Flow |
| TCS Modifier                                 | Concomitant Atrial Valve Repair/Replacement       |
| Arrhythmia Modifier                          | Concomitant Mitral Valve Repair/Replacement       |
| NYHA 4                                       | Concomitant Tricuspid Valve Repair/Replacement    |
| Ventilator                                   | Concomitant Cardiac Surgery                       |
| ICD                                          | Coronary Artery Disease                           |
| Dialysis                                     | RHF reported at 1 month post implant              |
| IABP                                         | Pump related infection within 3m post implant     |
| Warfarin                                     | Driveline infection within 3m post-implant        |
| Visual Analog Scale                          | Sepsis within 3m post-implant                     |
| Mobility Issues                              | Positive blood cultures within 3m post-implant    |
| Self-care Issues                             | Other infections within 3m post-implant           |
| Blood Type O                                 |                                                   |
| BSA                                          |                                                   |
| BMI                                          |                                                   |
| Pulmonary Hypertension                       |                                                   |
| Diabetes                                     |                                                   |

**Supplemental Table 2. Risk Adjusted Survival by RHF groups for patients who are alive at 3 months post-implant and have completed both 1- and 3-month follow-up according to subtype of RHF. Cox proportional hazard model.**

| <b>Effect</b>                                  | <b>Hazard Ratio</b> | <b>P-value</b> |
|------------------------------------------------|---------------------|----------------|
| Persistent RHF                                 | 2.797               | <0.0001        |
| Denovo RHF                                     | 1.479               | 0.0101         |
| Resolved RHF                                   | 1.282               | 0.0053         |
| Positive Blood Cultures within 3m Post Implant | 2.043               | <0.0001        |
| Previous Cardiac Surgeries                     | 1.320               | 0.0001         |
| BUN (mg/dL) 5-unit change                      | 1.025               | 0.0077         |
| Age At Implant                                 | 1.024               | <0.0001        |
| VAS: Own Health State                          | 0.995               | 0.0116         |
| Albumin (g/dL)                                 | 0.853               | 0.0045         |
| Blood Type O                                   | 0.800               | 0.0011         |
| Married                                        | 0.770               | 0.0004         |

Potential Covariates: Supplemental Table 1

**Supplemental Table 3. Risk Adjusted Survival by RHF groups for patients who are alive at 3 months post-implant and have completed both 1- and 3-month follow-up according to subtype of RHF. Completing risk model.**

| <b>Effect</b>                                  | <b>Hazard Ratio</b> | <b>P-value</b> |
|------------------------------------------------|---------------------|----------------|
| Persistent RHF                                 | 2.600               | <0.0001        |
| Denovo RHF                                     | 1.480               | 0.0122         |
| Resolved RHF                                   | 1.300               | 0.0026         |
| Positive Blood Cultures within 3m Post Implant | 1.833               | 0.0007         |
| Destination Therapy                            | 1.634               | <0.0001        |
| Previous Cardiac Surgeries                     | 1.347               | <0.0001        |
| Left Ventricle Assist Device - Centrifugal     | 1.229               | 0.0338         |
| Age At Implant                                 | 1.023               | <0.0001        |
| BUN (mg/dL) 5-unit change                      | 1.022               | 0.0173         |
| LVEF < 20% (severe) (0,1)                      | 0.856               | 0.0342         |
| Albumin (g/dL)                                 | 0.818               | 0.0004         |
| Hispanic                                       | 0.642               | 0.0137         |

Potential Covariates: Supplemental Table 1
